# Supplementary material
Source: MDPI journal article supplement (https://www.mdpi.com/2624-5647/2/3/26)
Supplement: s1 [file s1]

**Supplementary Table 1** : List of excluded studies with reasons for exclusion (n=29)

| Study                                                                                                                                                                                                                            | Reason for Exclusion                        |
|----------------------------------------------------------------------------------------------------------------------------------------------------------------------------------------------------------------------------------|---------------------------------------------|
| Aksoy,E., et al., <i>Neurological findings spectrum in celiac disease</i> . Turkish Journal of Pediatrics, 2016. <b>58</b> (3): p. 233-240                                                                                       | Did not implement GFD                       |
| Ambrosetto, G.; Antonini, L.; Tassinari, C.A., <i>Occipital lobe seizures related to clinically asymptomatic celiac disease in adulthood</i> . Epilepsia, 1992. <b>33</b> (3): p.467-481                                         | Did not report on adherence to GFD          |
| Antigoni, M., et al., <i>Increased prevalence of silent celiac disease among Greek epileptic children</i> . Pediatric Neurology, 2007. <b>36</b> (3): p.165-169                                                                  | Did not implement GFD                       |
| Briani, C., et al., <i>Neurological complications of celiac disease and autoimmune mechanisms: A prospective study</i> . Journal of Neuroimmunology, 2008. <b>195</b> (1-2): p. 171-175                                          | Additional neurological condition           |
| Bruni, O., et al., <i>An unusual case of drug-resistant epilepsy in a child with non-celiac gluten sensitivity</i> . Seizure, 2014. <b>23</b> (8): p.674-676                                                                     | Case study                                  |
| Bürk, K., et al., <i>Neurological symptoms in patients with biopsy proven celiac disease</i> . Movement Disorders, 2009. <b>24</b> (16): p. 2358-2362                                                                            | Does not report on effects of GFD           |
| Caio, G., et al., <i>Clinical and immunological relevance of anti-neuronal antibodies in celiac disease with neurological manifestations</i> . Gastroenterology and Hepatology from Bed to Bench, 2015. <b>8</b> (2): p. 146-152 | Did not implement GFD                       |
| Cakir, D., et al., <i>Subclinical neurological abnormalities in children with celiac disease receiving a gluten-free diet</i> . Journal of Pediatric Gastroenterology and Nutrition, 2007. <b>45</b> (3): p. 366-369             | Paper does not compare before and after GFD |
| Canales, P., et al., <i>Epilepsy and celiac disease: Favorable outcome with a gluten-free diet in a patient refractory to antiepileptic drugs</i> . Neurologist, 2006. <b>12</b> (6): p. 318-321                                 | Case study                                  |
| Cernibori, A., and G. Gobbi, <i>Partial seizures, cerebral calcifications and celiac disease</i> . The Italian Journal of Neurological Sciences, 1995. <b>16</b> (3): p.187-191                                                  | Non-English paper                           |
| Chapman, R.W.G.; Laidlow, J.M.; Colin-Jones, D., <i>Increased prevalence of epilepsy in coeliac disease</i> . British Medical Journal, 1978. <b>2</b> (6132): p. 250-251                                                         | Does not report on adherence to GFD         |
| Cicarelli, G., et al., <i>Neurologic manifestations in adult celiac disease</i> . Italian Journal of Neurological Sciences. 1997. <b>18</b> (4): p. 39                                                                           | Unable to obtain paper                      |

|                                                                                                                                                                                                                               |                                                            |
|-------------------------------------------------------------------------------------------------------------------------------------------------------------------------------------------------------------------------------|------------------------------------------------------------|
| Cicarelli, G., et al., <i>Clinical and neurological abnormalities in adult celiac disease</i> . Neurological Sciences. 2003. <b>24</b> (5): p. 311-317                                                                        | Results for epilepsy patients missing                      |
| Diaconu, G., et al., <i>Celiac disease with neurologic manifestations in children</i> . Revista medico-chirurgicala a Societatii de Medici si Naturalsti din Iasi. 2013. <b>117</b> (1): p. 88-94                             | Non-English paper                                          |
| Diaz, R.M.; Gonzalez-Rabelino, G.; Delfin, A., <i>Epilepsy, cerebral calcifications and coeliac disease</i> . The importance of an early diagnosis. Revista de Neurological. 2005. <b>40</b> (7): p. 417-420                  | Non-English paper                                          |
| Fois, A., et al., <i>Celiac disease and epilepsy in pediatric patients</i> . Child's Nervous System. 1994. <b>10</b> (7): p. 450-454                                                                                          | Does not report on effects of GFD                          |
| Gobbi, G., <i>Coeliac disease, epilepsy and cerebral calcifications</i> . Biomedicine and Pharmacotherapy. 1993. <b>47</b> (4): p. 176                                                                                        | Duplicate. Different lead author.                          |
| Harper, E.; Moses, H.; Lagrange, A.; <i>Occult celiac disease presenting as epilepsy and MRI changes that responded to gluten-free diet</i> . Neurology. 2007. <b>68</b> (7): p. 533-534                                      | Patient has additional neurological condition.             |
| Jericho, H.; Sansotta, N.; Guandalini, S.; <i>Extraintestinal manifestations of celiac disease: effectiveness of the gluten-free diet</i> . Journal of Pediatric Gastroenterology and Nutrition. 2017. <b>65</b> (1): p.75-79 | Does not specify number of patients with epilepsy/seizures |
| Johnson, A.M., et al., <i>Coeliac disease, epilepsy, and cerebral calcifications: Association with TG6 autoantibodies</i> . Developmental Medicine and Child Neurology. 2013. <b>55</b> (1): p. 90-93                         | Case study                                                 |
| Kieslich, M., et al., <i>Brain white matter lesions in celiac disease: a prospective study of 75 diet-treated patients</i> . Pediatrics. 2001. <b>108</b> (2)                                                                 | Wrong outcomes                                             |
| Labate, A., et al., <i>Silent celiac disease in patients with childhood localization-related epilepsies</i> . Epilepsia. 2001. <b>42</b> (9): p. 1153-1155                                                                    | AEDs started after administering GFD                       |
| Maniar, V.P.; Yadav, S.S.; Gokhale, Y.A.; <i>Intractable seizures and metabolic bone disease secondary to celiac disease</i> . Journal of Association of Physicians of India. 2010. <b>58</b> (8)                             | Does not report on adherence to GFD                        |
| Mavroudi, A.; et al.; <i>Successful treatment of epilepsy and celiac disease with a gluten-free diet</i> . Pediatric Neurology. 2005. <b>33</b> (4): p. 292-295                                                               | Case study                                                 |
| Morris, J.S.; Ajdukiewicz, A.B.; Read, A.E.; <i>Neurological disorders and adults coeliac disease</i> . Gut. 1970. <b>11</b> (7): p. 549-554                                                                                  | Wrong outcomes                                             |
| Peltola, M.; et al.; <i>Hippocampal sclerosis in refractory temporal lobe epilepsy is associated with gluten sensitivity</i> . Journal of Neurology, Neurosurgery and Psychiatry. 2009. <b>80</b> (6): p. 626-630             | Did not implement GFD                                      |

|                                                                                                                                                                                            |                                                                     |
|--------------------------------------------------------------------------------------------------------------------------------------------------------------------------------------------|---------------------------------------------------------------------|
| Sansotta, N.; et al.; Celiac disease symptom resolution: <i>Effectiveness of the gluten-free diet</i> , Journal of Pediatric Gastroenterology and Nutrition. 2018. <b>66</b> (1): p. 48-52 | Does not specify number of patients in study with epilepsy/seizures |
| Szaflarska-Poplawska, A.; et al.; <i>Prevalence and clinical picture of coeliac disease in children with epilepsy</i> , Pediatria Polska. 2006. <b>81</b> (1): p. 46-49                    | Non-English paper                                                   |
| Zelnik, N.; et al.; <i>Range of neurologic disorders in patients with celiac disease</i> , Pediatrics. 2004. <b>113</b> (61): p. 1672-1676                                                 | Does not report on adherence to GFD                                 |

**Supplementary Table 2 Characteristics of selected studies for review**

| <b>First author, year of publication, Country</b> | <b>Study design</b>                                                                                                            | <b>Number of Participants</b>                                                                          | <b>Number of control individuals</b> | <b>Gluten-free diet duration</b> | <b>Follow-up</b>      | <b>Outcomes measured</b>                                          |
|---------------------------------------------------|--------------------------------------------------------------------------------------------------------------------------------|--------------------------------------------------------------------------------------------------------|--------------------------------------|----------------------------------|-----------------------|-------------------------------------------------------------------|
| Arroyo 2002<br>Argentina                          | Single Centre<br>Prospective cohort                                                                                            | 24                                                                                                     | 0                                    | > 2 years                        | Mean 7.4 years        | Seizure frequency<br>EEG pattern<br>CT scan results               |
| Bashiri 2016<br>Iran                              | 2 centre<br>Prospective cohort                                                                                                 | 7 patients biopsy confirmed CD went on GFD out of a total of 113 patients with epilepsy                | 0                                    | 5 months                         | 3 months and 5 months | Prevalence of CD in people with epilepsy<br><br>Seizure frequency |
| Berio 2013<br>Italy                               | Single centre<br>Retrospective cohort                                                                                          | 12                                                                                                     | 0                                    | 1-10 years                       | Not reported          | Anti-tTG serum antibodies<br>EEG pattern                          |
| Casciato 2015<br>Italy                            | Single centre<br>Prospective cohort                                                                                            | 10 patients with CD went on GFD (2 lost at follow-up) out of a total of 211 patients with epilepsy     | 0                                    | > 6 months                       | Mean 1.9 years        | Seizure frequency                                                 |
| Gerace 2017<br>Italy                              | <i>In vivo</i> and <i>in vitro</i> model experiment exploring the effects of gliadin peptide 31-43 on kainate-induced-epilepsy | Study using mice.                                                                                      | n/a                                  | n/a                              | n/a                   | Electrophysical recordings                                        |
| Gobbi 1992<br>Italy                               | Multicentre<br>Prospective cohort                                                                                              | 29 with CD went on GFD out of a total 43 (24 with epilepsy and calcifications, 5 with CD and epilepsy) | 3                                    | > 6 months                       | Mean 25.4 months      | Seizure frequency                                                 |

|                         |                                     |                                                                                                                                                                                                                        |                                               |                                                                                                                              |                |                                                              |
|-------------------------|-------------------------------------|------------------------------------------------------------------------------------------------------------------------------------------------------------------------------------------------------------------------|-----------------------------------------------|------------------------------------------------------------------------------------------------------------------------------|----------------|--------------------------------------------------------------|
| Hernandez 1998<br>Spain | Single centre<br>Case series        | 4                                                                                                                                                                                                                      | 0                                             | 2-4 years                                                                                                                    | Mean 2.7 years | Seizure frequency<br>Cranial CT calcifications               |
| Isikay 2015<br>Turkey   | Single Centre study<br>Case control | 132 patients formerly<br>diagnosed with CD out<br>of 175 children with CD<br>with no neurological<br>symptoms.<br>Study group divided<br>into newly-diagnosed<br>(n=43) and formerly-<br>diagnosed (n=132)<br>patients | 99 age/sex-<br>matched<br>healthy<br>children | Formerly-<br>diagnosed<br>patients GFD<br>for<br>> 6 months<br><br>Newly-<br>diagnosed<br>patients not<br>undertaking<br>GFD |                | EEG pattern<br>Laboratory findings                           |
| Liccheta 2011<br>Italy  | Single centre<br>Prospective cohort | 8                                                                                                                                                                                                                      | 0                                             | > 6 months                                                                                                                   | 12 months      | Seizure frequency<br>EEG pattern<br>AED reduction            |
| Parisi 2014<br>Italy    | Single centre<br><br>before/ after  | 19                                                                                                                                                                                                                     | 0                                             | 6 months                                                                                                                     | 6 months       | EEG pattern                                                  |
| Sel 2017<br>Turkey      | Single centre<br>Prospective cohort | 4 (3.41%) CD patients<br>with initial symptom<br>seizures, out of 8<br>(6.83%) with initial<br>symptom being<br>neurological from study<br>of 117 atypical patients                                                    | 0                                             | > 2 months                                                                                                                   | unclear        | Seizure frequency<br>EEG pattern                             |
| Volta 2002<br>Italy     | Single centre<br>Prospective cohort | 3 CD with epilepsy<br>patients from total of<br>160 patients with CD                                                                                                                                                   | 20                                            | 12 months                                                                                                                    | mean 6 years   | Seizure frequency<br>Serological anti-neuronal<br>antibodies |

Location of studies: Italy 7, Argentina 1, Iran 1, Spain 1, Turkey 2
